# Supplementary material for: Development and Testing of a Mobile App for Management of Gestational Diabetes in Nepal: Protocol for a User-Centered Design Study and Exploratory Randomized Controlled Trial
Source: PubMed Central journal article supplement (PMC11535795; doi:10.2196/59423), 2024-10-21
Supplement: resprot_v13i1e59423_app1.pdf [file resprot_v13i1e59423_app1.pdf]

**SUMMARY STATEMENT**

**PROGRAM CONTACT:**  
Laura Povlich  
301-496-1653  
povlichlk@mail.nih.gov

( Privileged Communication )

*Release Date:* 03/22/2019  
*Revised Date:*

---

*Application Number:* 1 R21 TW011377-01

Principal Investigator

RAWAL, SHRISTI

Applicant Organization: RBHS-SCHOOL/ HEALTH RELATED PROFESSIONS

*Review Group:* ZRG1 HDM-A (55)  
Center for Scientific Review Special Emphasis Panel  
PAR-16-292 Mobile Health: Technology and Outcomes in Low and Middle Income Countries

*Meeting Date:* 03/01/2019  
*Council:* MAY 2019  
*Requested Start:* 07/01/2019

*RFA/PA:* PAR18-242  
*PCC:* MHEALTH

---

*Project Title:* Development and Testing of a Mobile Health Application for Management of Gestational Diabetes

*SRG Action:* Impact Score:30 Percentile:15 #

*Next Steps:* Visit [https://grants.nih.gov/grants/next\\_steps.htm](https://grants.nih.gov/grants/next_steps.htm)

*Human Subjects:* 30-Human subjects involved - Certified, no SRG concerns

*Animal Subjects:* 10-No live vertebrate animals involved for competing appl.

*Gender:* 2A-Only women, scientifically acceptable

*Minority:* 5A-Only foreign subjects, scientifically acceptable

*Children:* 3A-No children included, scientifically acceptable

| Project Year | Direct Costs Requested | Estimated Total Cost |
|--------------|------------------------|----------------------|
| 1            | 125,000                | 192,012              |
| 2            | 100,000                | 153,610              |
| <b>TOTAL</b> | <b>225,000</b>         | <b>345,622</b>       |

---

## **1R21TW011377-01 Rawal, Shristi**

**RESUME AND SUMMARY OF DISCUSSION:** This application proposes to develop and test the usability and preliminary efficacy of a smartphone application-based lifestyle intervention to support self-management of gestational diabetes mellitus (GDM) among patients in Nepal. During discussion, the Editors agreed that the proposal addresses a significant and emerging public health concern in low- and middle-income countries (LMICs) and the goals of the study are supported by a relatively well constructed set of scientific premises. If successful, findings may inform strategies to improve glycemic control and reduce adverse pregnancy outcomes in woman with GDM. The investigative team is outstanding though there is concern regarding unbalanced expertise at different study sites. Additional strengths of the proposal include a strong conceptual framework, rigorous study design and robust plans to build mHealth research capacity at the partnering LMIC institution. During discussion, however, the editors identified issues that detract somewhat from these strong points. The feasibility of bringing patients back for follow up is not adequately considered and it not clear that the proposed follow-up timeline is sufficient to establish glycemic control. These issues notwithstanding, overall, findings are expected to have a high to moderate impact on prenatal care for woman with gestational diabetes mellitus in resource limited settings.

**DESCRIPTION (provided by applicant):** The prevalence of gestational diabetes mellitus (GDM) is rapidly increasing worldwide, particularly in low- and middle-income countries (LMICs). Tight glycemic control via diet and lifestyle modification is critical to treating GDM and preventing its adverse health consequences, including increased risk of type 2 diabetes (T2D), in women and their children. However, in many resource-limited countries including Nepal, time for diet/lifestyle counseling often competes with other components of antenatal care. Mobile health (mHealth) technology can be leveraged to promote healthy behaviors, and support self-management and treatment of GDM, but this approach has not been tried previously in any LMICs. Taking a user-centered design approach, here we propose to develop a culturally- appropriate smartphone application (app) to support self-management of GDM (mGDM), and test its usability and preliminary efficacy, among patients in a tertiary level, university hospital of Kathmandu University, Nepal. Based on the Social Cognitive Theory framework for behavior change, this app will assist in self-management of GDM by increasing the patient's knowledge and self-efficacy to adhere to the recommended diet and physical activity regimens. The app will also help clinicians by generating easily digestible visual displays of patient data and behaviors, which can aid in their clinical decision-making and counseling. In the requirements gathering phase, 6 GDM patients will be recruited into a focus group to view paper prototypes and provide feedback on its features and functions. Additional questions will be asked about their perceived barriers, facilitators, and strategies for lifestyle modification. Key informant interviews will also be conducted with 5 clinicians (gynecologists, dietician, physical therapist) and 3 family members, asking them to provide feedback on the mGDM prototype, especially pertaining to the usefulness and format of the graphic summaries of patient data. After revising paper prototypes and developing the first digital prototype, six additional patients with GDM will be recruited for two rounds of usability testing including think-aloud protocol and focus group discussions. Final prototype will be developed following an iterative process of product design and user testing. After developing the app, we will recruit 60 women who are newly diagnosed with GDM, and randomly assign them to one of two treatment conditions: either (A) mGDM app + standard care, or (B) standard care alone, from 28 weeks of gestation to delivery. In this proof-of-concept trial, feasibility outcomes will be app usage, self-monitoring adherence, and app usability and acceptability. Exploratory treatment outcomes will be glycemic control measures at 6 weeks postpartum, neonatal birthweight, and rates of labor induction and caesarean delivery. Findings from the proposed study will empirically inform a future randomized control trial that will be fully powered to test the efficacy and cost-effectiveness of the mGDM app in improving treatment outcomes, using an R01 mechanism. We expect that the research activities and capacity building initiatives proposed in this application will build the institutional skills and create the organizational structure needed to enable future mHealth research initiatives at Kathmandu University, even beyond the scope of this proposed project.

**PUBLIC HEALTH RELEVANCE:** Adequate control and management of gestational diabetes mellitus (GDM) during pregnancy is critical to mitigate its short- and long-term health consequences in women and their children and may serve as a key strategy to curb the escalating type 2 diabetes epidemic in low- and middle-income countries (LMICs). Taking a user-centered design approach, here we propose to develop a culturally-appropriate smartphone application (app) to support self-management of GDM, and additionally, test its usability and preliminary efficacy, among patients in a sub-urban hospital setting in Nepal. App-based lifestyle interventions for GDM management are not common, especially in LMICs where its prevalence is rapidly increasing, and as such, our study findings will have important public health relevance for a broader population.

## CRITIQUE

### EDITORS' IMPACT STATEMENTS:

**Overall Impact 1:** The prevalence of gestational diabetes mellitus (GDM) is rapidly increasing worldwide, particularly in low- and middle-income countries (LMICs). Tight glycemic control via diet and lifestyle modification is critical to treating GDM and preventing its adverse health consequences, including increased risk of type 2 diabetes (T2D). However, in many resource-limited countries including Nepal, time for diet/lifestyle counseling often competes with other components of clinical care. Mobile health (mHealth) technology can be leveraged to promote healthy behaviors and support self-management and treatment of GDM. Taking a user-centered design approach, the investigators propose to develop a culturally- appropriate smartphone application (app) to support self-management of GDM (mGDM), and test its usability and preliminary efficacy, among patients in a tertiary level, university hospital of Kathmandu University, Nepal. There are two phases of this proposal. In the requirements gathering phase, 6 GDM patients will be recruited into a focus group to view paper prototypes and provide feedback on its features and functions. After revising paper prototypes and developing the first digital prototype, six additional patients with GDM will be recruited for two rounds of usability testing including think-aloud protocol and focus group discussions. Final prototype will be developed following an iterative process of product design and user testing. In the second phase, after developing the app, the investigators will recruit 60 women who are newly diagnosed with GDM, and randomly assign them to one of two treatment conditions: either (A) mGDM app + standard care, or (B) standard care alone, from 28 weeks of gestation to delivery. In this proof-of-concept trial, feasibility outcomes will be app usage, self-monitoring adherence, and app usability and acceptability. Exploratory treatment outcomes will be glycemic control measures at 6 weeks postpartum, neonatal birthweight, and rates of labor induction and caesarean delivery. Based on the Social Cognitive Theory framework for behavior change, this app will assist in self-management of GDM by increasing the patient's knowledge and self-efficacy to adhere to the recommended diet and physical activity regimens. The app will also help clinicians by generating easily digestible visual displays of patient data and behaviors, which can aid in their clinical decision-making and counseling. Therefore, the premise is solid and balanced, and the study is poised to resolve a long-standing issue of gestational diabetes mellitus (GDM) in Nepal. There are a few minor weaknesses, including unbalanced experiences in different facilities, and institutional support; and 6 weeks glycemic control may not be good enough. However, the overall impact and significance outweigh the minor weaknesses.

**Overall Impact 2:** This project seeks to develop and test the usability, acceptability, and preliminary effectiveness of a mobile app for the management of gestational diabetes in Nepal, where there is a growing prevalence of pregnancies complicated by GDM. The project is of high importance given the significant poor outcomes for both babies and their mothers who develop this condition. The advantage of a mobile app for providing a lifestyle intervention in Nepal, given the country's mobile service penetration is over 100%. The investigators, while mostly junior in the states, and more senior in Nepal, seem capable of successfully accomplishing all study aims. The project is innovative, as such mHealth innovations have not been introduced into Nepal, despite the mobile service penetration. Consistent

with the RFA guidelines, the investigators propose an entire aim of creating an organizational framework to strengthen mhealth research capacity at Katmandu University, where some of their project team worked together and successfully launched Nepal's first patient-centered health education app. The project is based on an appropriate theoretical framework, social cognitive theory, which suggests that increased self-efficacy and social support serve as mediators leading to improved self-management of GDM. The analytic plan is strong. Timeline is acceptable and there are no problems related to the clinical trial. Given these strengths, this proposal has a high likelihood of having a major impact, especially when combined with the strong preexisting relationship between investigators at the partnering institutions.

**Overall Impact 3:** The topic under study is woman with gestational diabetes and an mHealth strategy to help achieve glycemic control through diet and life style modifications to reduce adverse pregnancy outcomes. Gestational diabetes, which can adversely affect the mother and baby, is a growing concern in South Asia. The team has strong complementary expertise to support the PI (who is Nepalese). The behavior change intervention is guided by a strong theoretical framework (social cognitive theory) but not all relevant variables that influence diet appear to be included; feasibility metrics are robust. The collaboration seems to have strong potential for sustainability and capacity building (university and teaching hospital partners in Nepal). Minor concerns have to do with the inclusion of women with diabetes but are otherwise low risk. The sample size may not have sufficient power to detect actual behavior change (the baseline measurement is unclear as well) but will be able to describe feasibility. While there are other mobile health interventions in this context, this proposal has sufficient rigor and premise that findings have high potential for impact. Human subjects: protections adequately described; the exclusion of pregnant females under 18 is not a concern for this feasibility study.

## MAIL REVIEWERS' CRITIQUES:

### CRITIQUE 4

Significance: 1  
Investigator(s): 1  
Innovation: 1  
Approach: 2  
Environment: 1

**Overall Impact:** This well-conceived proposal that builds upon prior collaborative research with Rutgers University in chronic disease monitoring and management. The mHealth applications to be developed, field tested and utilized will focus on a patient centered approach to woman with gestational diabetes to help achieve tight glycemic control through diet and life style modifications in the hope of reducing adverse pregnancy outcomes.

### 1. Significance:

#### Strengths

- South Asia has become the diabetes hub of the world. Interventions that in low-resource settings like Nepal, where specialized antepartum care is limited, must rely heavily on consumer education, and on cost-effective ways of support patient practices to improve pregnancy outcomes.
- The far-reaching aims described in the proposal, if proven feasible and acceptable will provide a nidus for scale up.
- The potential for disrupting the intergenerational cycle of risk for type II diabetes and its longer-term sequelae is compelling.

## **Weaknesses**

- No weaknesses seen.

## **2. Investigator(s):**

### **Strengths**

- The PI is a Nepalese researcher on the faculty of Rutgers University, with a background in epidemiology. She has a history of collaboration on research directly linked to diabetes, cardiovascular disease, obesity and the knowledge of local dietary patterns.
- The team that has been assembled is stellar in its background with expertise in mHealth technology, high risk obstetrics, nutritional science, physical activity and risk reduction, obesity research and community health and provides a balance between US and Nepalese investigators.

### **Weaknesses**

- Given the vast and relevant experience of Dr. Pagoto, it is unlikely that 52 hours of consulting time will be sufficient.
- The team may benefit from additional biostatistical expertise.

## **3. Innovation:**

### **Strengths**

- The promotion of optimal health behaviors to gestational diabetic women via mHealth in low/middle income countries has not previously been described.
- The user-centered design approach consistent with Social Cognitive Theory is an innovative cost-effective initiative particularly appropriate for under-resourced settings. The monitoring of app usage, adherence and practical usability/ acceptability will provide critical feasibility findings necessary to a devise larger intervention trial.

### **Weaknesses**

- No weaknesses seen.

## **4. Approach:**

### **Strengths**

- While limited in scope, the “pilot” phase of the proposal seeks to assure appropriate input and adherence to local and cultural norms.
- There is sufficient expertise in app development among us research collaborators. However, partnering with a commercial firm within Nepal will strengthen mHealth capability and increase infrastructure to support future research.

### **Weaknesses**

- The clinical trial outcomes of glycemic control at 6 weeks post-partum, neonatal birthweight and rates of labor induction and caesarean deliveries may not be well correlated with tight glycemic control.
- The relative low number of women in the trial component may not allow for adequate trend data.

## **5. Environment:**

### **Strengths**

- The support of the Nepal Health Research Council of Nepal, Kathmandu University and the central role of its primary teaching hospital supports an appropriate environment to conduct a proof of consent study which will incorporate 60 women, newly diagnosed with gestational diabetes. It will employ a newly developed mHealth app and compare these with standard of care alone to determine clearly stated pre-specific outcomes.

**Weaknesses**

- It is not clear if the recruitment will occur at outpatient clinics linked to the hospital or among hospitalized patients.
- The percent of women/families that have access to smartphones is not mentioned.

**Study Timeline:**

**Strengths**

- The study timeline is appropriate.

**Weaknesses**

- None noted.

**Protections for Human Subjects:**

Acceptable Risks and/or Adequate Protections

Data and Safety Monitoring Plan (Applicable for Clinical Trials Only):

Acceptable

**Inclusion of Women, Minorities and Children:**

- Sex/Gender: Distribution justified scientifically
- Race/Ethnicity: Distribution justified scientifically
- For NIH-Defined Phase III trials, Plans for valid design and analysis: Not applicable
- Inclusion/Exclusion of Children under 18: Excluding ages <18; justified scientifically

**Vertebrate Animals:**

Not Applicable (No Vertebrate Animals)

**Biohazards:**

Not Applicable (No Biohazards)

**Applications from Foreign Organizations:**

Justified

**Select Agents:**

Acceptable

**Resource Sharing Plans:**

Acceptable

**Authentication of Key Biological and/or Chemical Resources:**

Not Applicable (No Relevant Resources)

**Budget and Period of Support:**

Recommend as Requested

**CRITIQUE 5**

Significance: 3

Investigator(s): 5

Innovation: 4

Approach: 4

Environment: 4

**Overall Impact:** This project proposes to develop a culturally appropriate smartphone application (app) to support self-management of gestational diabetes mellitus (GDM), and test its usability and preliminary efficacy, among patients in a tertiary level, university hospital of Kathmandu University, Nepal. Based on the Social Cognitive Theory framework for behavior change, this app will assist in self-management of GDM by increasing the patient's knowledge and self-efficacy to adhere to the recommended diet and physical activity regimens. The premise is solid and balanced and the study is poised to resolve a long-standing issue of gestational diabetes mellitus (GDM) in Nepal. The proposed studies of use of mobile app and theoretical framework do not offer a notable advantage over studies already done, and relevance to the success is questionable. Even if successful, it is unclear that these results would move the field of mobile app. At Nepali site, the facility has the experience of using mobile app. The facilities at Nepal site was not described well and it is unclear whether the university can fully support the high demands associated with this mHealth study.

**1. Significance:**

**Strengths**

- The premise is solid and balanced, and the study is poised to resolve a long-standing issue of gestational diabetes mellitus (GDM) in Nepal.
- Preliminary results support the value of using the mobile app to study GDM. These studies will provide specific insights into the role of mobile app in GDM.
- This application seeks to develop a mobile app and advance current knowledge of taking care of GDM. If successful, such understanding of GDM would further allow use of theoretical framework for GDM to be accomplished, which would have a high impact on the field of new born babies and taking care of pregnant woman.

**Weaknesses**

- The proposed studies of use of the mobile app and theoretical framework do not offer a notable advantage over studies already done, and relevance to the success is questionable. Even if successful, it is unclear that these results would move the field of mobile app.
- The application lacks justification that use of the app over text messaging as use of app always need to be on but text messaging is better controlled by the doctors.

**2. Investigator(s):**

### **Strengths**

- Over the past couple of years, the PI has published relevant papers in this area but the PI does not see patients like a medical doctor.
- The consultant in theoretical framework is highly accomplished in the field of behavior change.
- Co-investigator in Nepal has firsthand experience.

### **Weaknesses**

- The experience of the PI for conducting these complicated studies is not extensive. He does not appear to have significant expertise to provide guidance for critical aspects such as use of the theoretical framework and mobile app.
- The team appears to lack expertise in mobile app development, particularly important for completing Aims 1 and 2.
- The investigators have not worked together as a team.

## **3. Innovation:**

### **Strengths**

- The combination of mobile app and theoretical foundation is distinct from other approaches in mHealth to study GDM.

### **Weaknesses**

- Although the project uses new methods such as theoretical framework and mobile app, these methods are unlikely to generate different conceptual approaches related to theoretical framework than what currently drives mHealth.
- The concept of use of app is not new to the field.
- The research question is a modest extension of the investigator's existing work and does not move in new directions.
- Continued use of the well-established mobile app will yield only incremental additional knowledge.

## **4. Approach:**

### **Strengths**

- Specific Aim 2 was well-designed to test the main hypothesis. The investigators proposed well-controlled, appropriately powered set of rigorous experiments that addresses the impact of mobile app within this model system.
- The experimental design is comprehensive and cohesively covers all aspects of use of mobile app.

### **Weaknesses**

- The approach to develop the mobile app lacks any methodology like agile software development.
- Use of text messaging along with the mobile app would improve the outcome.

## **5. Environment:**

### **Strengths**



- The environment at Rutgers is outstanding because it has all of the necessary environment to build the app.
- At Nepal site, the facility has the experience of using mobile app.

**Weaknesses**

- The facilities at Nepal site were not described and it is unclear whether the university can fully support the high demands associated with this mHealth studies.

**Study Timeline:**

**Strengths**

- The time line is well justified along with the app development and getting feedback.

**Weaknesses**

- None.

**Protections for Human Subjects:**

Acceptable Risks and/or Adequate Protections

Data and Safety Monitoring Plan (Applicable for Clinical Trials Only):

Acceptable

**Inclusion of Women, Minorities and Children:**

- Sex/Gender: Distribution justified scientifically
- Race/Ethnicity: Distribution justified scientifically
- For NIH-Defined Phase III trials, Plans for valid design and analysis: Not applicable
- Inclusion/Exclusion of Children under 18: Excluding ages <18; justified scientifically

**Vertebrate Animals:**

Not Applicable (No Vertebrate Animals)

**Biohazards:**

Not Applicable (No Biohazards)

**Applications from Foreign Organizations:**

Justified

**Select Agents:**

Not Applicable (No Select Agents)

**Resource Sharing Plans:**

Acceptable

**Authentication of Key Biological and/or Chemical Resources:**

Not Applicable (No Relevant Resources)

## **Budget and Period of Support:**

Recommend as Requested

## **CRITIQUE 6**

Significance: 1

Investigator(s): 2

Innovation: 2

Approach: 1

Environment: 1

**Overall Impact:** The overall impact of this project is likely to be high based on several strengths and only a few weaknesses. There is a need for this type of MHealth app to overcome limitations in health resources for management of GDM in LMIC – a gap that also exists in HIC but for which there is active research. The team, although comprised of several relatively junior investigators with some key senior collaborators, appears to have the expertise and drive to see the project through to completion. The environment is strong on both sides, and the likelihood of building capacity for future mHealth is particularly strong given a) the senior expertise in Nepal and prior work; b) the specific inclusion of a plan within Aim 3. The scientific aims for development of the smart phone app and testing within a pilot study seems appropriate, although recruitment criteria should also include women with GDM but otherwise low risk pregnancy.

### **1. Significance:**

#### **Strengths**

- This study will address a significant and emerging problem in LMIC – GDM.
- The study appropriately identifies the key constraints in LMIC for counseling and care of women during pregnancy (and although they don't address the primary constraint which is universal screening/testing (!) they are working in a hospital with universal testing). One of the constraints to testing is what to do about it if you find it and this app may provide a feasible/acceptable management strategy.
- They create a cogent argument for this type of app and one can see the generalizability of such an app in other settings in other countries. Thus, if development, found feasible/acceptable and with future testing, this could be an important addition to prenatal care for women with GDM in LMIC.
- Although not mentioned, and absent glucose monitoring the app could be expanded as a primary resource on diet and physical activity during pregnancy for women as part of prenatal care who do not have GDM.
- The partnership and prior relationships between KU and Rutgers (and the investigators) and prior app development in Nepal to be expanded here enhance the significance of this project from the perspective of capacity building in mHealth.

#### **Weaknesses**

- There are no identified weaknesses.

### **2. Investigator(s):**

#### **Strengths**

- The team has the appropriate expertise to carry out the project, including expertise in GDM/obstetrics/antenatal care in Nepal, diet and lifestyle in Nepal, app based PA monitoring, app development including smartphone based development, SCT/behavior change within the context of mHealth and app; scientific coordination at high levels with Nepal, research grant administration, etc.

#### **Weaknesses**

- Several members of the research team are quite junior, the PI is in first year of faculty position at Rutgers. This is not necessarily a concern, as the career trajectories of the junior investigators is quite impressive, and it is balanced by senior collaborators, particularly at KU.

### **3. Innovation:**

#### **Strengths**

- The investigators appropriately argue that their planned development of an app which emphasizes dietary and physical activity monitoring as management of GDM in an environment with barriers to glucose monitoring and high clinical follow up.
- The app will provide an innovative approach to capture physical activity which has not been tested previously in LMIC.
- The extent to which they will develop content for an app for women, who may be vegetarian and whose carbohydrate intake may be close to 70%, is new, needed and of potential generalizability throughout South Asia.

#### **Weaknesses**

- It may be argued that the project is not innovative because it may be more about moving prenatal GDM monitoring from paper and pamphlets (SOC, which we don't know the content or quality of – although it might be good) to a mobile app.

### **4. Approach:**

#### **Strengths**

- The plan/set of activities for strengthening mHealth research in Nepal is strong, plausible and has high potential for continued growth beyond the project period.
- The approach for the app development are appropriate in sequence and accompanying research methodologies (Focus groups/key informant interviews, think out loud methodology and pilot testing compared to SOC).
- Their approach will build on prior results (which we do not much about them) regarding the diet and physical activity of women in Nepal. They will address guiding women in knowledge and self-efficacy regarding carbohydrate sources and assessment.
- They recognize the need to consider caste.
- These last 2 points add to the significance and likely overall impact of the project in that there is experience in the rather quick adaption of diet related materials/app in Nepal to the context of India.

#### **Weaknesses**

- The goals and sample size calculation for the pilot focusing on change in glucose challenge (prenatal to postpartum) is a stretch, as if the researchers are trying for a health outcome. Having said that the sample size and approach of the pilot to examine usability of the app and collection of data on biologic variables is appropriate, and the pilot results should inform the design of a larger trial to test the app.

## **5. Environment:**

### **Strengths**

- The environment appears appropriate for the project. They have identified the landscape for mHealth in Nepal, and although not everyone has one, they are likely to be on the rise.
- There is shared experience in the development of smartphone app for health through another project, and prior collaborations amongst the group.
- There is appropriate resources and structure in Nepal to carry out this project, in terms of scientific and medical resources, and technical expertise in app development.

### **Weaknesses**

- There are no recognized weaknesses

## **Study Timeline:**

### **Strengths**

- The timeline seems appropriate for app development, which is largely related to content development and user considerations, and the execution of the pilot trial is justified with data/evidence by the applicant.
- The PI has an ongoing study with some of the other investigators on diet and physical activity of women in Nepal and thus likely has local content which can be adapted for this project. They are not starting from scratch.
- The strength of the environment and the prior collaborations allow for this timeline.

### **Weaknesses**

- The timeline of app development (9 months at most) and recruitment for the pilot (6 months) may be optimistic.

## **Protections for Human Subjects:**

### Acceptable Risks and/or Adequate Protections

- This is a minimal risk study of a smartphone app as an alternate (better) support for women with GDM within the context of ongoing prenatal care.

### Data and Safety Monitoring Plan (Applicable for Clinical Trials Only):

#### Acceptable

- The description seems appropriate given the level of risk and the ongoing care of the participants in the pilot (Aim 2).

## **Inclusion of Women, Minorities and Children:**

- Sex/Gender: Distribution justified scientifically
- Race/Ethnicity: Distribution justified scientifically
- For NIH-Defined Phase III trials, Plans for valid design and analysis: Not applicable
- Inclusion/Exclusion of Children under 18: Excluding ages <18; not justified scientifically
- They will not recruit women with GDM during pregnancy who are less than 18, which I take to be age of majority in Nepal. There is no justification for this, although it could be argued that a pregnant woman < 18 with GDM would be so unusual as to detract from the scientific purpose of obtaining pilot data.

**Vertebrate Animals:**

Not Applicable (No Vertebrate Animals)

**Biohazards:**

Not Applicable (No Biohazards)

**Applications from Foreign Organizations:**

Not Applicable (No Foreign Organizations)

**Select Agents:**

Not Applicable (No Select Agents)

**Resource Sharing Plans:**

Not Applicable (No Relevant Resources)

**Authentication of Key Biological and/or Chemical Resources:**

Not Applicable (No Relevant Resources)

**Budget and Period of Support:**

Recommend as Requested

**THE FOLLOWING SECTIONS WERE PREPARED BY THE SCIENTIFIC REVIEW OFFICER TO SUMMARIZE THE OUTCOME OF DISCUSSIONS OF THE REVIEW COMMITTEE, OR REVIEWERS' WRITTEN CRITIQUES, ON THE FOLLOWING ISSUES:**

**PROTECTION OF HUMAN SUBJECTS:** ACCEPTABLE

**INCLUSION OF WOMEN PLAN:** ACCEPTABLE

**INCLUSION OF MINORITIES PLAN:** ACCEPTABLE

**INCLUSION OF CHILDREN PLAN:** ACCEPTABLE

**COMMITTEE BUDGET RECOMMENDATIONS:** The budget was recommended as requested.

---

Footnotes for 1 R21 TW011377-01; PI Name: Rawal, Shristi

# Ad hoc or special section application percentiled against "Total CSR" base.

NIH has modified its policy regarding the receipt of resubmissions (amended applications). See Guide Notice NOT-OD-14-074 at <http://grants.nih.gov/grants/guide/notice-files/NOT-OD-14-074.html>. The impact/priority score is calculated after discussion of an application by averaging the overall scores (1-9) given by all voting reviewers on the committee and

multiplying by 10. The criterion scores are submitted prior to the meeting by the individual reviewers assigned to an application, and are not discussed specifically at the review meeting or calculated into the overall impact score. Some applications also receive a percentile ranking. For details on the review process, see [http://grants.nih.gov/grants/peer\\_review\\_process.htm#scoring](http://grants.nih.gov/grants/peer_review_process.htm#scoring).

## MEETING ROSTER

**Center for Scientific Review Special Emphasis Panel  
CENTER FOR SCIENTIFIC REVIEW  
PAR-16-292 Mobile Health: Technology and Outcomes in Low and Middle Income Countries  
ZRG1 HDM-A (55)  
03/01/2019**

**Notice of NIH Policy to All Applicants:** Meeting rosters are provided for information purposes only. Applicant investigators and institutional officials must not communicate directly with study section members about an application before or after the review. Failure to observe this policy will create a serious breach of integrity in the peer review process, and may lead to actions outlined in NOT-OD-14-073 at <https://grants.nih.gov/grants/guide/notice-files/NOT-OD-14-073.html> and NOT-OD-15-106 at <https://grants.nih.gov/grants/guide/notice-files/NOT-OD-15-106.html>, including removal of the application from immediate review.

### **CHAIRPERSON(S)**

**KLESGES, ROBERT C, PHD**  
PROFESSOR  
DEPARTMENT OF PUBLIC HEALTH SCIENCES  
CENTER FOR ADDICTION PREVENTION RESEARCH  
SCHOOL OF MEDICINE  
UNIVERSITY OF VIRGINIA  
CHARLOTTESVILLE, VA 22911

### **MEMBERS**

**BARCLAY, GILLIAN R, DDS, DPH, MPH**  
VICE PRESIDENT, PROGRAMS  
WALDEN UNIVERSITY  
MINNEAPOLIS, MN 55401

**DE ERAUSQUIN, GABRIEL ALEJANDRO, MD, PHD**  
PROFESSOR AND FOUNDING CHAIR  
DEPARTMENT OF PSYCHIATRY AND NEUROLOGY  
SCHOOL OF MEDICINE  
UNIVERSITY OF TEXAS RIO GRANDE VALLEY  
BROWNSVILLE, TX 78520

**DOEBBELING, BRADLEY NIEL, MD**  
PROFESSOR  
SCIENCE OF HEALTH CARE DELIVERY  
AND BIOMEDICAL INFORMATICS  
COLLEGE OF HEALTH SOLUTIONS  
ASU DOWNTOWN PHOENIX CAMPUS  
PHOENIX, AZ 85004

**DYKES, PATRICIA C, PHD**  
ASSOCIATE PROFESSOR  
PROGRAM DIRECTOR CENTER FOR NURSING EXCELLENCE  
CENTER FOR PATIENT SAFETY RESEARCH AND PRACTICE  
BRIGHAM AND WOMEN'S HOSPITAL  
HARVARD MEDICAL SCHOOL  
BOSTON, MA 02120

**EHRHARDT, STEPHAN, MD, MPH**  
ASSOCIATE PROFESSOR  
DEPARTMENT OF EPIDEMIOLOGY  
JOHNS HOPKINS SCHOOL OF PUBLIC HEALTH  
BALTIMORE, MD 21205

**ESWARAN, HARI, PHD**  
PROFESSOR  
DEPARTMENT OF OBSTETRICS AND GYNECOLOGY  
UNIVERSITY OF ARKANSAS FOR MEDICAL SCIENCES  
LITTLE ROCK, AR 72205

**IYENGAR, MADURAI SRIRAM, PHD**  
ASSOCIATE PROFESSOR OF BIOMEDICAL INFORMATICS  
COLLEGE OF MEDICINE  
TEXAS A AND M HEALTH SCIENCE CENTER  
HOUSTON, TX 77030

**LEVKOFF, SUE E, SCD, SM**  
PROFESSOR AND ENDOWED CHAIR  
SENIORSMART CENTER OF ECONOMIC EXCELLENCE  
COLLEGE OF SOCIAL WORK  
UNIVERSITY OF SOUTH CAROLINA  
COLUMBIA, SC 29201

**LI, LANG, PHD**  
PROFESSOR AND CHAIR  
DEPARTMENT OF BIOMEDICAL INFORMATICS  
COLLEGE OF MEDICINE  
THE OHIO STATE UNIVERSITY  
COLUMBUS, OH 43210

**MENON, USHA, PHD**  
PROFESSOR AND VICE DEAN OF RESEARCH  
COLLEGE OF NURSING  
UNIVERSITY OF SOUTH FLORIDA  
TAMPA, FL 33612-4766

**ODAME, KOFI, PHD**  
ASSOCIATE PROFESSOR  
ENGINEERING SCIENCES  
THAYER SCHOOL OF ENGINEERING  
DARTMOUTH COLLEGE  
HANOVER, NH 03755

**PHILIS-TSIMIKAS, ATHENA, MD**  
CORPORATE VICE PRESIDENT  
ENDOCRINOLOGY, DIABETES & METABOLISM  
SCRIPPS WHITTIER DIABETES INSTITUTE  
LA JOLLA, CA 92037

SOLIMAN, AMR, MD, PHD  
PROFESSOR  
DEPARTMENT OF COMMUNITY HEALTH AND SOCIAL  
MEDICINE  
CUNY SCHOOL OF MEDICINE  
NEW YORK, NY 10031

WARRICK, CYNTHIA A, PHD  
PRESIDENT  
STILLMAN COLLEGE  
TUSCALOOSA, AL 35401

WOLINSKY, FREDRIC D, SCD, PHD  
PROFESSOR AND COLLOTON CHAIR, EMERITUS  
DEPARTMENT OF HEALTH MANAGEMENT AND POLICY  
COLLEGE OF PUBLIC HEALTH  
THE UNIVERSITY OF IOWA  
IOWA CITY, IA 52242

XIAN, XIAOJUN, PHD  
RESEARCH SCIENTIST  
CENTER FOR BIOELECTRONICS AND BIOSENSORS  
THE BIODESIGN INSTITUTE  
ARIZONA STATE UNIVERSITY  
TEMPE, AZ 85287

#### **MAIL REVIEWER(S)**

ADAMSON, LAUREN B, PHD  
REGENTS' PROFESSOR EMERITA  
DEPARTMENT OF PSYCHOLOGY  
COLLEGE OF ARTS AND SCIENCES  
GEORGIA STATE UNIVERSITY  
ATLANTA, GA 30303

AHAMED, SHEIKH IQBAL, PHD  
PROFESSOR  
DEPARTMENT OF MATHEMATICS, STATISTICS  
AND COMPUTER SCIENCE  
MARQUETTE UNIVERSITY  
MILWAUKEE, WI 53233

ANDERSON, PAGE L, PHD  
ASSISTANT PROFESSOR  
DEPARTMENT OF PSYCHOLOGY  
GEORGIA STATE UNIVERSITY  
ATLANTA, GA 30303

ANWAR, MOHD, PHD  
ASSOCIATE PROFESSOR  
THE SECURE USABLE SOCIAL MEDIA  
AND NETWORKS LAB  
NORTH CAROLINA A AND T STATE UNIVERSITY  
GREENSBORO, NC 27411

ARCOLEO, KIMBERLY JOAN, PHD  
ASSOCIATE PROFESSOR  
ASSOCIATE DEAN FOR RESEARCH  
SCHOOL OF NURSING  
UNIVERSITY OF ROCHESTER  
ROCHESTER, NY 14642

AREAN, PATRICIA A, PHD  
PROFESSOR  
DEPARTMENT OF PSYCHIATRY AND BEHAVIORAL  
SCIENCES  
SCHOOL OF MEDICINE  
UNIVERSITY OF WASHINGTON  
SEATTLE, WA 98102

ARONSON, IAN DAVID, PHD  
PRINCIPAL INVESTIGATOR  
CENTER FOR TECHNOLOGY AND BEHAVIORAL HEALTH  
NATIONAL DEVELOPMENT  
AND RESEARCH INSTITUTES, INC  
NEW YORK, NY 10010

ASCHE, CARL, MSC, PHD  
PROFESSOR  
COLLEGE OF MEDICINE  
UNIVERSITY OF ILLINOIS  
PEORIA, IL 61615

BARRIO, CONCEPCION, PHD  
ASSOCIATE PROFESSOR  
SCHOOL OF SOCIAL WORK  
UNIVERSITY OF SOUTHERN CALIFORNIA  
LOS ANGELES, CA 90089

BAUM, MARIANNA K, PHD  
PROFESSOR  
DEPARTMENT OF DIETETICS AND NUTRITION  
ROBERT STEMPEL COLLEGE OF PUBLIC HEALTH  
AND SOCIAL WORK  
FLORIDA INTERNATIONAL UNIVERSITY  
MIAMI, FL 33199

BECK, JOHN ROBERT, MD  
DEPUTY DIRECTOR  
DEPARTMENT OF CANCER PREVENTION AND CONTROL  
FOX CHASE CANCER CENTER  
PHILADELPHIA, PA 19111

BOIVIN, MICHAEL JOSEPH, MPH, PHD  
PROFESSOR  
DEPARTMENTS OF PSYCHIATRY AND  
NEUROLOGY/OPHTHALMOLOGY  
COLLEGE OF OSTEOPATHIC MEDICINE  
MICHIGAN STATE UNIVERSITY  
EAST LANSING, MI 48824

BONATO, PAOLO, PHD  
ASSOCIATE PROFESSOR  
SPAUDLING REHABILITATION HOSPITAL  
MOTION ANALYSIS LABORATORY  
HARVARD MEDICAL SCHOOL  
BOSTON, MA 02114

BOWMAN, NATALIE MCCARTER, MPH, MD  
ASSISTANT PROFESSOR OF MEDICINE  
SCHOOL OF MEDICINE  
UNIVERSITY OF NORTH CAROLINA CHAPEL HILL  
CHAPEL HILL, NC 27516



BREITBART, WILLIAM, MD  
PROFESSOR AND CHIEF OF PSYCHIATRY SERVICE  
DEPARTMENT OF PSYCHIATRY  
AND BEHAVIORAL SCIENCES  
SLOAN-KETTERING INSTITUTE FOR  
CANCER RESEARCH  
NEW YORK, NY 10022

CALLAWAY, CLIFTON W, MD, PHD  
PROFESSOR AND EXECUTIVE VICE-CHAIR  
DEPARTMENT OF EMERGENCY MEDICINE  
UNIVERSITY OF PITTSBURGH  
PITTSBURGH, PA 15261

CAMPBELL, FRANCES A, PHD  
SENIOR SCIENTIST  
FRANK PORTER GRAHAM CHILD DEVELOPMENT CENTER  
UNIVERSITY OF NORTH CAROLINA  
CHAPEL HILL, NC 27599-8180

CAULFIELD, LAURA E, PHD  
PROFESSOR  
CENTER FOR HUMAN NUTRITION  
DEPARTMENT OF INTERNATIONAL HEALTH  
THE JOHNS HOPKINS BLOOMBERG  
SCHOOL OF PUBLIC HEALTH  
BALTIMORE, MD 21205

CHEN, YING QING, PHD  
FULL MEMBER  
PROGRAM IN BIOSTATISTICS  
VACCINE AND INFECTIOUS DISEASE DIVISION  
FRED HUTCHINSON CANCER RESEARCH CENTER  
SEATTLE, WA 98109

COOK, DIANE JOYCE, PHD  
HUIE-ROGERS CHAIR PROFESSOR  
SCHOOL OF ELECTRICAL ENGINEERING  
AND COMPUTER SCIENCE  
WASHINGTON STATE UNIVERSITY  
PULLMAN, WA 99164

DAGOGO-JACK, SAMUEL, MBBS, MD  
A C MULLINS CHAIR IN TRANSLATIONAL RESEARCH  
PROFESSOR OF MEDICINE AND DIRECTOR  
DIVISION OF ENDOCRINOLOGY, DIABETES AND  
METABOLISM  
THE UNIVERSITY OF TENNESSEE HEALTH SCIENCE  
CENTER  
MEMPHIS, TN 38163

DATAR, ASHLESHA, PHD  
SENIOR ECONOMIST  
DIRECTOR OF PROGRAM ON CHILDREN AND FAMILIES  
CENTER FOR ECONOMIC AND SOCIAL RESEARCH (CESR)  
UNIVERSITY OF SOUTHERN CALIFORNIA  
LOS ANGELES, CA 90089

DERMAN, RICHARD J, MD, MPH  
ASSOCIATE PROVOST, GLOBAL AFFAIRS  
DIRECTOR, GLOBAL HEALTH RESEARCH  
PROFESSOR, OBSTETRICS AND GYNECOLOGY  
THOMAS JEFFERSON UNIVERSITY  
PHILADELPHIA, PA 19017

DIAMANTIDIS, CLARISSA JONAS, MD  
ASSISTANT PROFESSOR  
SCHOOL OF MEDICINE  
DUKE UNIVERSITY  
DURHAM, NC 27701

DUERR, ANN C, MD, PHD  
AFFILIATE PROFESSOR  
HIV VACCINE TRIALS NETWORK  
FRED HUTCHINSON CANCER RESEARCH CENTER  
DEPARTMENTS OF EPIDEMIOLOGY AND GLOBAL HEALTH  
UNIVERSITY OF WASHINGTON  
SEATTLE, WA 98109

EDDY, JOHN MARK, PHD  
DIRECTOR OF COMMUNITY BASED RESEARCH  
AND SENIOR RESEARCH SCIENTIST  
FAMILY TRANSLATIONAL RESEARCH GROUP  
DEPARTMENT OF CARDIOLOGY AND COMPREHENSIVE  
CARE  
NEW YORK UNIVERSITY COLLEGE OF DENTISTRY  
NEW YORK, NY 10010

ERIKSEN, MICHAEL PAUL, SCD  
PROFESSOR AND DIRECTOR  
INSTITUTE OF PUBLIC HEALTH  
GEORGIA STATE UNIVERSITY  
ATLANTA, GA 30302

FARMER, ELIZABETH M, PHD  
PROFESSOR AND DEAN OF THE SCHOOL OF SOCIAL WORK  
UNIVERSITY OF PITTSBURGH  
UNIVERSITY PARK, PA 16802

FOX, WILLIAM CHRISTOPHER, MD  
ASSOCIATE PROFESSOR; PROGRAM DIRECTOR  
ENDOVASCULAR NEUROSURGERY FELLOWSHIP  
ASSOCIATE PROGRAM DIRECTOR, NEUROSURGERY  
RESIDENCY  
DEPARTMENT OF NEUROSURGERY  
UNIVERSITY OF FLORIDA  
GAINESVILLE, FL 32610

FRENCH, DUSTIN D, PHD  
SENIOR RESEARCH SCIENTIST  
DEPARTMENT OF OPHTHALMOLOGY, NORTHWESTERN  
UNIVERSITY FEINBERG SCHOOL OF MEDICINE  
SENIOR RESEARCH SCIENTIST  
EDWARD HINES, JR VA HOSPITAL  
CHICAGO, IL 60141

FULLER, SHERRILYNNE S, PHD  
PROFESSOR EMERITUS  
DEPARTMENT OF BIOMEDICAL INFORMATICS  
AND MEDICAL EDUCATION  
SCHOOL OF MEDICINE AND INFORMATION SCHOOL  
UNIVERSITY OF WASHINGTON  
SEATTLE, WA 98195

GONG, YANG, PHD, MD  
ASSOCIATE PROFESSOR  
SCHOOL OF BIOMEDICAL INFORMATICS  
UNIVERSITY OF TEXAS HEALTH SCIENCE  
CENTER AT HOUSTON  
HOUSTON, TX 77030

HALL, DREW ALEXANDER, PHD  
ELECTRICAL AND COMPUTER ENGINEERING  
UNIVERSITY OF CALIFORNIA, SAN DIEGO  
LA JOLLA, CA, CA 92093

HANSEN, MATTHEW LEE, MD  
ASSOCIATE PROFESSOR  
DEPARTMENT OF EMERGENCY MEDICINE  
OREGON HEALTH AND SCIENCE UNIVERSITY  
PORTLAND, OR 97239

HERSH, WILLIAM R, MD  
PROFESSOR AND CHAIR  
DEPARTMENT OF MEDICAL INFORMATICS  
AND CLINICAL EPIDEMIOLOGY  
SCHOOL OF MEDICINE  
OREGON HEALTH AND SCIENCE UNIVERSITY  
PORTLAND, OR 97239

INAN, OMER TOLGA, PHD  
ASSISTANT PROFESSOR  
SCHOOL OF ELECTRICAL AND COMPUTER ENGINEERING  
GEORGIA INSTITUTE OF TECHNOLOGY  
ATLANTA, GA 30308

IRAZUZTA, JOSE E, MD  
PROFESSOR  
DIRECTOR OF EDUCATION AND RESEARCH  
DEPARTMENT OF PEDIATRICS  
DIVISION OF PEDIATRIC CRITICAL CARE  
UNIVERSITY OF FLORIDA  
JACKSONVILLE, FL 32207

JO, JAVIER ANTONIO, MS, PHD  
PROFESSOR OF ELECTRICAL AND COMPUTER  
ENGINEERING  
STEPHENSON RESEARCH AND TECHNOLOGY CENTER  
THE UNIVERSITY OF OKLAHOMA  
NORMAN, OK 73072

JOHNSON, HEATHER M, MD  
ASSOCIATE PROFESSOR  
DIVISION OF CARDIOVASCULAR MEDICINE  
DEPARTMENT OF MEDICINE  
UNIVERSITY OF WISCONSIN SCHOOL OF MEDICINE  
AND PUBLIC HEALTH  
MADISON, WI 53792

KOHLER, HANS-PETER, PHD  
PROFESSOR OF DEMOGRAPHY AND ECONOMICS  
DEPARTMENT OF SOCIOLOGY  
UNIVERSITY OF PENNSYLVANIA  
PHILADELPHIA, PA 19104

KOVRT, BRANDON ALAN, MD, PHD  
ASSOCIATE PROFESSOR  
PSYCHIATRY AND BEHAVIORAL SCIENCES  
GEORGE WASHINGTON UNIVERSITY  
SCHOOL OF MEDICINE AND HEALTH SCIENCES  
WASHINGTON, DC 20037

KUSHNIRUK, ANDRE WILLIAM, PHD  
DIRECTOR AND PROFESSOR  
SCHOOL OF HEALTH INFORMATION SCIENCE  
UNIVERSITY OF VICTORIA  
VICTORIA, BRITISH COLUMBIA V8W 2Y2  
CANADA

LIU, LONGJIAN, MD, PHD  
ASSOCIATE PROFESSOR  
DEPARTMENT OF EPIDEMIOLOGY AND BIostatISTICS  
DREXEL UNIVERSITY  
PHILADELPHIA, PA 19102

MA, GRACE X, PHD  
ASSOCIATE DEAN FOR HEALTH DISPARITIES  
DIRECTOR, CENTER FOR ASIAN HEALTH, LAURA H CARNEL  
PROFESSOR AND PROFESSOR IN CLINICAL SCIENCE  
LEWIS KATZ SCHOOL OF MEDICINE  
TEMPLE UNIVERSITY  
PHILADELPHIA, PA 19122

MANNE, SHARON L, MA, PHD  
ASSOCIATE DIRECTOR, CANCER PREVENTION, CONTROL,  
AND POPULATION SCIENCE  
RUTGERS CANCER INSTITUTE OF NEW JERSEY  
ROBERT WOOD JOHNSON MEDICAL SCHOOL  
UNIVERSITY OF MEDICINE AND DENTISTRY NEW JERSEY  
NEW BRUNSWICK, NJ 08903

MOHAN, SUMIT, MPH, MBBS  
ASSOCIATE PROFESSOR OF EPIDEMIOLOGY AND MEDICINE  
MAILMAN SCHOOL OF PUBLIC HEALTH  
COLUMBIA UNIVERSITY MEDICAL CENTER  
NEW YORK , NY 10032

MURPHY, ROBERT L, MD  
PROFESSOR OF MEDICINE AND BIOMEDICAL ENGINEERING  
CENTER FOR GLOBAL HEALTH  
NORTHWESTERN UNIVERSITY  
CHICAGO, IL 60611

NACHEGA, JEAN BISIMWA, MD, PHD  
ASSOCIATE PROFESSOR  
DEPARTMENTS OF EPIDEMIOLOGY, INFECTIOUS DISEASES,  
AND MICROBIOLOGY  
SCHOOL OF PUBLIC HEALTH  
UNIVERSITY OF PITTSBURGH  
PITTSBURGH, PA 15261

OGUNSEITAN, OLADELE A, MPH, PHD  
PROFESSOR  
DEPARTMENT OF PUBLIC HEALTH AND SOCIAL ECOLOGY  
COLLEGE OF HEALTH SCIENCES  
SCHOOL OF SOCIAL ECOLOGY  
UNIVERSITY OF CALIFORNIA, IRVINE  
IRVINE, CA 92697

PASUPATHY, KALYAN S, PHD  
ASSOCIATE PROFESSOR  
MAYO COLLEGE OF MEDICINE  
SCIENTIFIC DIRECTOR  
CLINICAL ENGINEERING LEARNING LAB  
MAYO CLINIC  
ROCHESTER, MN 55905

POELLABAUER, CHRISTIAN, PHD  
ASSOCIATE PROFESSOR  
DEPARTMENT OF COMPUTER SCIENCE  
AND ENGINEERING  
UNIVERSITY OF NOTRE DAME  
NOTRE DAME, IN 46556

POSTMUS, JUDY L, PHD  
PROFESSOR AND DIRECTOR  
SCHOOL OF SOCIAL WORK, RUTGERS UNIVERSITY  
CENTER ON VIOLENCE AGAINST WOMEN AND CHILDREN  
DUNELLEN, NJ 08812

QIN, LIDONG, PHD  
PROFESSOR  
DEPARTMENT OF NANOMEDICINE  
DEPARTMENT OF CELL AND DEVELOPMENTAL BIOLOGY  
HOUSTON METHODIST RESEARCH INSTITUTE  
HOUSTON, TX 77030

QUINTILIANI, LISA M, PHD  
ASSISTANT PROFESSOR  
DEPARTMENT OF MEDICINE  
SECTION OF GENERAL INTERNAL MEDICINE  
BOSTON UNIVERSITY  
BOSTON, MA 02118

RANGACHARI, PAVANI, PHD  
ASSOCIATE PROFESSOR  
DEPARTMENT OF HEALTH MANAGEMENT AND  
INFORMATICS  
ASSOCIATE DEAN FOR PRACTICE AND COMMUNITY  
HEALTH  
COLLEGE OF ALLIED HEALTH SCIENCES  
GEORGIA HEALTH SCIENCES UNIVERSITY  
AUGUSTA, GA 30912

SCHMELER, KATHLEEN, MD  
ASSOCIATE PROFESSOR  
DEPARTMENT OF GYNECOLOGIC ONCOLOGY AND  
REPRODUCTIVE MEDICINE  
UT MD ANDERSON CANCER CENTER  
HOUSTON, TX 77230

SHAW, RYAN JEFFREY, MS, PHD  
ASSOCIATE PROFESSOR  
SCHOOL OF NURSING  
CENTER FOR HEALTH INFORMATICS  
CENTER FOR PRECISION MEDICINE  
DUKE UNIVERSITY  
DURHAM, NC 27708

SHERMAN, SCOTT E, MD, MPH  
PROFESSOR  
DEPARTMENT OF POPULATION HEALTH, MEDICINE  
AND PSYCHIATRY  
VA NEW YORK HARBOR HEALTHCARE SYSTEM  
NEW YORK UNIVERSITY SCHOOL OF MEDICINE  
NEW YORK, NY 10016

SLUSHER, TINA MARYE, MD  
PROFESSOR OF PEDIATRICS CRITICAL CARE  
DIVISION OF GLOBAL PEDIATRICS PARK AVENUE G7  
UNIVERSITY OF MINNESOTA  
MINNESOTA, MN 55415

STAIANO, AMANDA E, PHD  
ASSISTANT PROFESSOR  
PENNINGTON BIOMEDICAL RESEARCH CENTER  
LOUISIANA STATE UNIVERSITY  
BATON ROUGE, LA 70808

STAVRINOS, DESPINA, PHD  
ASSISTANT PROFESSOR  
DEPARTMENT OF PSYCHOLOGY  
UNIVERSITY OF ALABAMA AT BIRMINGHAM  
BIRMINGHAM, AL 35294

STEEL, JENNIFER L, PHD  
ASSOCIATE PROFESSOR  
DIRECTOR, CENTER FOR EXCELLENCE IN  
BEHAVIORAL MEDICINE  
DEPARTMENT OF SURGERY  
UNIVERSITY OF PITTSBURGH  
PITTSBURGH, PA 15213

SUBICA, ANDREW MAKOTO, PHD  
ASSISTANT PROFESSOR IN RESIDENCE  
UNIVERSITY OF CALIFORNIA, RIVERSIDE  
SOM CENTER, HEALTHY COMMUNITIES  
RIVERSIDE, CA 92521

SWARD, KATHERINE ANN, RN, PHD  
ASSOCIATE PROFESSOR  
DEPARTMENT OF BIOMEDICAL INFORMATICS  
COLLEGE OF NURSING  
UNIVERSITY OF UTAH  
SALT LAKE CITY, UT 84112

THOMAS, JAMES CONLEY, PHD  
ASSOCIATE PROFESSOR OF PEDIATRICS AND MOLECULAR  
BIOLOGY  
UNIVERSITY OF SOUTH CAROLINA  
CHAPEL HILL, NC 27599

TURNER, ANNE M, MD  
ASSOCIATE PROFESSOR  
SCHOOL OF PUBLIC HEALTH  
HEALTH SERVICES  
BIOMEDICAL INFORMATICS AND MEDICAL EDUCATION  
UNIVERSITY OF WASHINGTON  
SEATTLE, WA 98105

WADE, ERIC, PHD  
ASSISTANT PROFESSOR  
DEPARTMENT OF MECHANICAL, AEROSPACE,  
AND BIOMEDICAL ENGINEERING  
UNIVERSITY OF TENNESSEE, KNOXVILLE  
KNOXVILLE, TN 37996

WALANI, SALIMAH R, MPH, PHD  
DIRECTOR  
GLOBAL HEALTH PROGRAMS  
MARCH OF DIMES  
WHITE PLAINS, NY 10605

WAN, XIUFENG HENRY, PHD  
PROFESSOR  
DEPARTMENT OF BASIC SCIENCES  
COLLEGE OF VETERINARY MEDICINE  
MISSISSIPPI STATE UNIVERSITY  
MISSISSIPPI STATE, MS 39762

WETHINGTON, ELAINE, PHD  
PROFESSOR  
DEPARTMENT OF HUMAN DEVELOPMENT  
BRONFENBRENNER CENTER FOR TRANSLATIONAL  
RESEARCH  
COLLEGE OF HUMAN ECOLOGY  
CORNELL UNIVERSITY  
ITHACA, NY 14853

WILDER-SMITH, PETRA E, LDS RCS E, DDS, PHD  
PROFESSOR  
DIRECTOR OF DENTAL PROGRAM  
BECKMAN LASER INSTITUTE  
SCHOOL OF MEDICINE  
UNIVERSITY OF CALIFORNIA, IRVINE  
IRVINE, CA 92612

**SCIENTIFIC REVIEW OFFICER**

VOSVICK, MARK ALLEN, PHD  
SCIENTIFIC REVIEW OFFICER  
CENTER FOR SCIENTIFIC REVIEW  
NATIONAL INSTITUTE OF HEALTH  
BETHESDA, MD 20892

**EXTRAMURAL SUPPORT ASSISTANT**

BUTLER, SEAN  
LEAD - EXTRAMURAL SUPPORT ASSISTANT  
CENTER FOR SCIENTIFIC REVIEW  
NATIONAL INSTITUTE OF HEALTH  
BETHESDA, MD 20892

**OTHER REVIEW STAFF**

TINKER, REBECCA I, PHD  
SCIENTIFIC REVIEW STAFF (CONTRACTOR)  
CENTER FOR SCIENTIFIC REVIEW  
NATIONAL INSTITUTE OF HEALTH  
BETHESDA, MD 20817

Consultants are required to absent themselves from the room during the review of any application if their presence would constitute or appear to constitute a conflict of interest.
